# Supplementary material for: Midkine expression by stem-like tumor cells drives persistence to mTOR inhibition and an immune-suppressive microenvironment
Source: PubMed Central journal article supplement (PMC9418323; doi:10.1038/s41467-022-32673-7), 2022-08-26
Supplement: 41467_2022_32673_MOESM2_ESM.pdf [file 41467_2022_32673_MOESM2_ESM.pdf]

File Name: Supplementary Data 1

Description: Differentially expressed genes in Tumor, TAF and normal mesenchymal cells. Each of cell type was compared to the other two cell types separately.

File Name: Supplementary Data 2

Description: Enriched regulons in SLS tumor cells compared to matched normal mesenchymal cells.

File Name: Supplementary Data 3

Description: Enriched regulons in IS tumor cells compared to matched normal mesenchymal cells.

File Name: Supplementary Data 4

Description: Marker genes of each cluster of primary culture cells.

File Name: Supplementary Data 5

Description: Re-defined gene signatures for each major cell type based on scRNA-Seq data.

File Name: Supplementary Data 6

Description: Identified genes mediating cell-cell interactions.

File Name: Supplementary Data 7

Description: Molecular interactions identified between TAF and SLS or IS tumor cells.
